# Supplementary material for: Ge-alloyed CZTSe thin film solar cell using molecular precursor adopting spray pyrolysis approach
Source: Royal Society of Chemistry journal article supplement (doi:10.1039/c6ra02291j), 2016-01-01
Supplement: c6ra02291j1.pdf [file c6ra02291j1.pdf]

## Supporting Information

### Ge-Alloyed CZTSe Thin Film Solar Cell Using Molecular Precursor Adopting Spray

#### Pyrolysis Approach

Dhruba B. Khadka<sup>‡</sup>, SeongYeon Kim, JunHo Kim\*

Department of Physics, Incheon National University, 12-1 Songdo-dong Yeonsu-gu, 406-772  
Incheon, South Korea

<sup>‡</sup> Current address: Global Research Center for Environment and Energy based on Nanomaterials  
Science (GREEN), National Institute for Material Science (NIMS), 1-1 Namiki, Tsukuba, Ibaraki,  
305-0044, Japan

\* Corresponding Author: JunHo Kim  
E-mail: jhk@inu.ac.kr

#### Tables and Figures: Supporting Information

**Table S1.** Lattice parameters of postselenized CZTSe and CZGTSe thin films calculated from XRD results. Here, the lattice parameters include errors  $a$  ( $\text{\AA}$ )  $\pm 0.005$   $\text{\AA}$ ,  $c$  ( $\text{\AA}$ )  $\pm 0.008$   $\text{\AA}$ ,  $V \pm 1$   $\text{\AA}^3$ ,  $\eta \pm 0.0004$ .

**Table S2.** Carrier concentration, mobility, resistivity of postselenized CZTSe and CZGTSe thin films obtained from Hall effect measurements.

**Fig. S1.** Precursor solution prepared in DIW and DMSO for deposition of CZTS and CZGTS thin films.

**Fig. S2.** X-ray diffraction patterns (a) and Raman spectra (b) of as-sprayed CZTS and CZGTS films.

**Fig. S3.** The plot of  $(E \times \text{EQE})^2$  vs photon energy to estimate the band gap of respective absorber layer.

**Table S1.** Lattice parameters of postselenized CZTSe and CZGTSe thin films calculated from XRD results. Here, the lattice parameters include errors  $a$  ( $\text{\AA}$ )  $\pm 0.005$   $\text{\AA}$ ,  $c$  ( $\text{\AA}$ )  $\pm 0.008$   $\text{\AA}$ ,  $V$   $\pm 1$   $\text{\AA}^3$ ,  $\eta \pm 0.0004$

| Fabricated Films | $a$ ( $\text{\AA}$ ) | $c$ ( $\text{\AA}$ ) | $V$ ( $\text{\AA}^3$ ) | $\eta(c/2a)$ |
|------------------|----------------------|----------------------|------------------------|--------------|
| CZTSe            | 5.681                | 11.355               | 365.8027               | 0.9976       |
| CZGTSe           | 5.656                | 11.276               | 360.7062               | 0.9968       |

**Table S2.** Carrier concentration, mobility, resistivity of postselenized CZTSe and CZGTSe thin films obtained from Hall effect measurements.

| Fabricated Films | Carrier Concentration ( $\text{cm}^{-3}$ ) | Mobility ( $\text{cm}^2/\text{V}\cdot\text{s}$ ) | Resistivity ( $\Omega\cdot\text{cm}$ ) |
|------------------|--------------------------------------------|--------------------------------------------------|----------------------------------------|
| CZTSe            | $5.946 \times 10^{17}$                     | $9.656 \times 10^{-1}$                           | $1.087 \times 10^1$                    |
| CZGTSe           | $5.242 \times 10^{18}$                     | 1.982                                            | 1.664                                  |

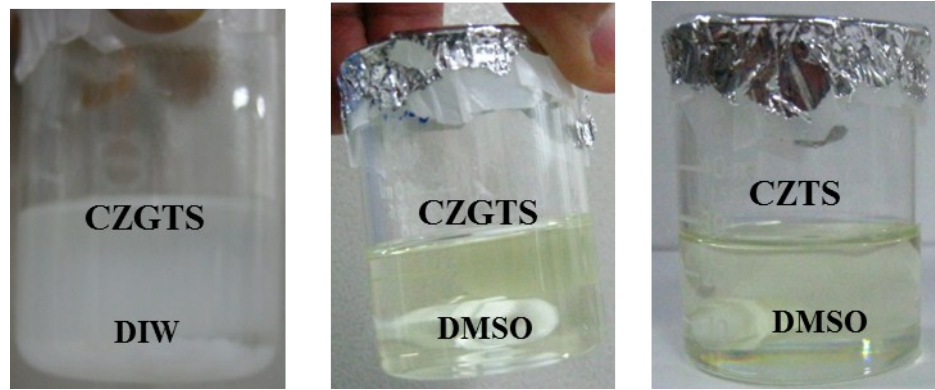

**Fig. S1.** Precursor solution prepared in DIW and DMSO for deposition of CZTS and CZGTS thin films. The precursor solution of CZTSe and CZGTSe prepared with DMSO is stable and well dissolved.

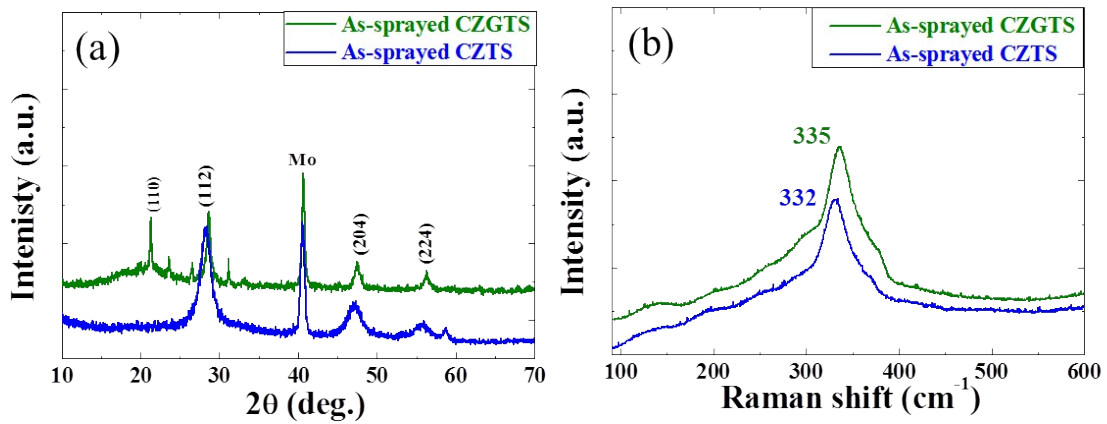

**Fig.S2.** X-ray diffraction patterns (a) and Raman spectra (b) of as-sprayed CZTS and CZGTS films.

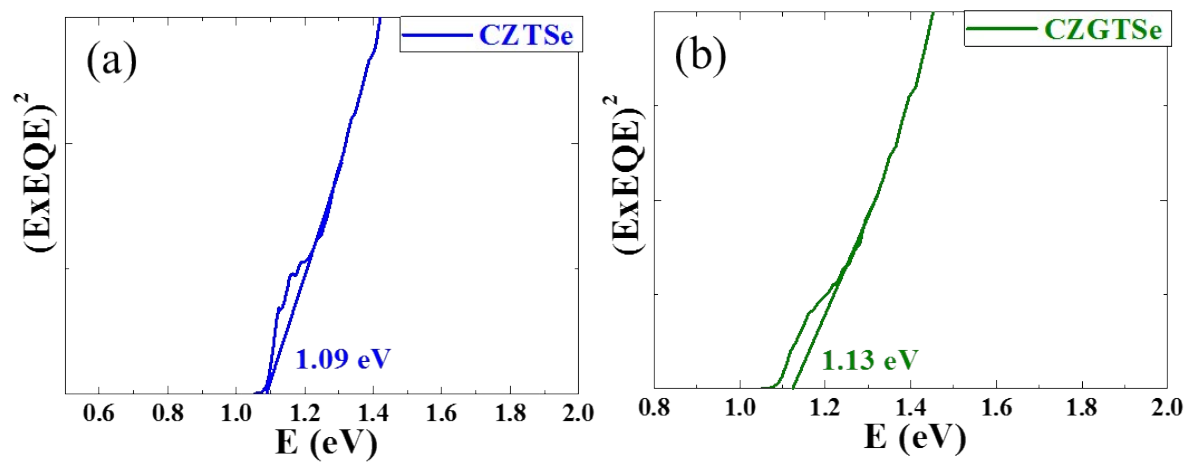

**Fig. S3.** The plot of  $(E \times EQE)^2$  vs photon energy to estimate the band gap of respective absorber layer.
